# Supplementary material for: Asymmetric cortical projections to striatal direct and indirect pathways distinctly control actions
Source: eLife. 2025 Oct 21;12:RP92992. doi: 10.7554/eLife.92992 (PMC12539805; doi:10.7554/eLife.92992)
Supplement: Figure 2—source data 1. [file elife-92992-fig2-data1.xlsx]

## Sheet: Sheet1
	connected	non-connected			Connected	non-connected
Input D1-record D2	12	18		Input D1-record D1	12	7
Input D2-record D1	29	11		Input D2-record D2	19	5

## Sheet: Sheet2
Input D1-record D2-D2-eGFP (+)	Input D1-record D2-D1-eGFP (-)	Input D2-record D1-D1-eGFP (+)	Input D2-record D1-D2-eGFP (-)		Input D1-record D1-D1-eGFP (+)	Input D1-record D1-D2-eGFP (-)	Input D2-record D2-D2-eGFP (+)	Input D2-record D2-D1-eGFP (-)
0.3684	0.4545	0.7857	0.6923		0.6	0.6667	0.7857	0.8
