# Supplementary material for: Asymmetric cortical projections to striatal direct and indirect pathways distinctly control actions
Source: eLife. 2025 Oct 21;12:RP92992. doi: 10.7554/eLife.92992 (PMC12539805; doi:10.7554/eLife.92992)
Supplement: Figure 3—figure supplement 1—source data 1. [file elife-92992-fig3-figsupp1-data1.xlsx]

## Sheet: D1-cre 5Hz stim
Control							5Hz
54.2318	98.5277	108.585	89.7689	18.8406	90.7003	122.562	103.021	133.912	99.9265	70.2272	153.851	51.4458	102.786
114.747	114.709	110.388	83.0011	80.7068	124.688	75.164	64.2783	72.8341	103.962	270.09	102.822	118.898	109.856
131.021	86.7629	81.0276	127.23	200.453	84.612	102.274	74.9739	71.1903	105.589	109.258	108.26	91.9529	83.5088
87.3068	102.08	89.3142	103.257	78.5061	88.7521	102.83			91.291	77.9257	101.189	87.7266	101.469
100.228	95.1124	105.509	101.722	143.938	85.837	98.9903
112.465	102.808	105.177	95.0216	77.5559	125.411	98.1796
86.1769	84.8534	101.391	41.4359	134.671	87.8062	111.124
90.8879	106.479	101.185	140.006	77.1016	103.638	94.7872
122.935	108.668	97.4236	118.558	88.2277	108.556	94.0893
		111.166	126.72	111.962	83.705	103.172
		103.038	108.938	120.642	96.3204	98.9627
		85.7964	64.342	67.396	119.975	97.8654

## Sheet: A2A-Cre 5Hz stim
Control								5Hz
81.1929	102.483	104.978	141.854	94.2977	97.1353	100.02	76.8878	109.688	101.701	158.91	117.06	86.2279	79.0935	186.577	92.7553
109.638	108.233	94.9566	65.585	123.19	102.556	49.8679	103.993	115.064	138.561	140.009	102.643	94.6636	82.2184	53.608	127.701
109.169	89.2847	100.065	92.5606	82.5118	100.308	150.112	119.119	143.934	123.602	105.26	129.101	164.49	88.2056	130.424	150.837
83.2143	104.341	123.677	99.8811	122.957	127.302	114.486	85.1436		92.9091			169.813	91.4854	101.186	85.8976
93.3821	96.475	88.4283	107.593	76.3232	75.7115	136.998	77.1205
123.404	99.1838	87.8948	92.5256	100.72	96.9867	48.5165	137.736
193.288	104.119	105.362	126.204	107.433	112.743	25.9644	107.289
67.3387	111.78	89.7935	91.6843	81.3656	87.461	47.5538	99.2619
39.3735	84.1008	104.844	82.1112	111.201	99.7955	226.482	93.4487
	122.494			65.1922	121.845	123.764	126.256
	84.2101			137.002	120.771	147.345	62.1326
	93.2958			97.8059	57.3842	28.8915	111.611
