# Supplementary material for: Asymmetric cortical projections to striatal direct and indirect pathways distinctly control actions
Source: eLife. 2025 Oct 21;12:RP92992. doi: 10.7554/eLife.92992 (PMC12539805; doi:10.7554/eLife.92992)
Supplement: Figure 3—figure supplement 1—source data 2. [file elife-92992-fig3-figsupp1-data2.xlsx]

## Sheet: D1-Cre 5Hz stim
Control										5Hz
79.4692	87.413	69.6613	99.5246	72.814	124.96	103.106	85.0494	120.783		138.241	117.466	288.246	103.261	121.631	88.2001	91.3045	157.958	57.1371
98.9649	64.4892	72.9161	97.8837	86.0545	65.7603	94.9944	76.9288	115.04		61.292	50.1131	86.4307	106.451	88.6593	87.9388	86.1837	122.103	29.8754
121.566	148.098	157.423	102.592	141.131	109.28	101.899	138.022	64.1773		68.1013	128.363	104.276	141.892	104.119	105.684	131.106	160.705	74.2234
86.126	114.568	89.6568	89.1291	99.4245	83.749	143.408	93.9935	116.134				61.9799	104.546	99.2233	131.366	92.3085	85.9257	13.3768
112.195	93.934	109.457	116.011	92.1094	93.9342	71.7154	90.5146	121.654
101.679	91.4978	100.886	94.8595	108.466	122.317	84.8762	115.492	62.2126
93.7206	89.5895	84.7519	142.13	95.6046	91.4514	111.922	102.74	154.555
118.172	104.185	111.054	70.1721	109.483	110.991	74.0613	76.5008	81.2252
88.1071	106.226	104.195	87.6978	94.9128	97.5579	114.017	120.759	64.22
		84.901	94.2257	68.5294	82.9019	93.4729	74.4118	89.7188
		95.8101	110.211	95.0752	103.252	87.2989	89.6849	107.974
		119.289	95.5636	136.395	113.846	119.228	135.903	102.307

## Sheet: A2A-Cre 5Hz stim
Control										5Hz
95.7017	85.5587	93.1888	118.852	55.1426	76.1906	122.299	97.405	91.3338	67.852	96.0315	79.3271	84.2573	99.2139	109.297	128.084	73.3738	101.043	112.493	113.778
149.507	106.824	109.289	98.5044	123.389	104.55	115.412	119.527	99.2733	103.092	108.195	136.337	115.859	100.412	107.749	123.174	113.971	96.5923	100.558	119.8
54.7912	107.617	97.5218	82.6434	121.468	119.259	62.2886	83.0677	109.393	129.056	80.1805	98.2614	113.864	104.663	97.0957	123.048	101.196	129.568	116.895	115.353
40.8041	94.3997	105.779	73.8695	104.612	102.088	89.6275	99.1477	100.373	99.689	106.769	93.0885			98.3099	140.698	114.367	128.709	117.218	31.6621
204.295	110.396	90.1539	112.91	86.1524	177.795	112.269	120.614	106.061	123.914
54.9011	95.2042	104.067	113.22	109.236	20.1166	98.1038	80.2387	93.5659	76.3973
95.3707	106.262	105.917	112.121	124.606	105.2	102.448	97.5251	88.3843	88.9178
109.018	107.461	92.1814	104.553	100.141	93.9154	99.0173	104.572	109.769	73.3289
95.6109	86.2772	101.902	83.3255	75.253	100.885	98.5345	97.9034	101.846	137.753
74.264	123.476			79.905	114.497	98.3471	108.944	101.644	99.1954
65.4374	90.6553			100.775	78.3243	84.6877	61.7259	97.5722	149.666
160.299	85.8689			119.32	107.179	116.965	129.331	100.784	51.1386
