# Supplementary material for: Asymmetric cortical projections to striatal direct and indirect pathways distinctly control actions
Source: eLife. 2025 Oct 21;12:RP92992. doi: 10.7554/eLife.92992 (PMC12539805; doi:10.7554/eLife.92992)
Supplement: Figure 3—figure supplement 2—source data 1. [file elife-92992-fig3-figsupp2-data1.xlsx]

## Sheet: D1-Cre
Control	20Hz
106.21	107.137
122.542	97.9856
71.2479	58.6355
92.4548	132.319
73.8017	96.2773
133.744
67.5977
143.531
88.871
106.509
102.847
90.6442
98.7126
95.2343
106.053
89.9656
22.1887
187.846
138.572
60.5852
100.843
74.8149
107.902
117.283
84.7408
118.419
96.8406
104.523
50.4742
145.002
56.1726
102.749
141.078
70.909
110.094
118.997
145.853
95.3427
58.8042
79.7005
73.1007
147.199
72.9968
138.794
88.2093
134.561
127.353
38.0862
76.6508
89.6823
133.667
113.895
93.3571
92.7484
129.953
70.4093
99.638
28.0346
165.038
106.927

## Sheet: A2A-Cre
Control	20Hz
82.5555	58.7964
135.946	92.2482
81.4981	96.7809
143.934	100.905
87.9707	73.5954
68.0956
94.1528
108.059
97.7881
68.716
96.9865
134.297
106.686
99.556
93.7578
99.8737
91.1193
109.007
67.8333
130
102.166
103.745
81.5888
114.666
139.411
126.033
34.5566
145.466
119.295
35.2393
51.341
101.04
147.619
108.16
105.372
86.4675
78.9899
104.444
116.566
92.6669
76.4954
130.838
100.371
106.681
92.9481
100.745
108.631
90.6236
81.1652
54.8544
163.98
97.4452
67.2846
135.27
177.636
65.4331
56.9305
122.283
120.898
56.8194
