# Supplementary material for: Asymmetric cortical projections to striatal direct and indirect pathways distinctly control actions
Source: eLife. 2025 Oct 21;12:RP92992. doi: 10.7554/eLife.92992 (PMC12539805; doi:10.7554/eLife.92992)
Supplement: Figure 3—source data 1. [file elife-92992-fig3-data1.xlsx]

## Sheet: D1-Cre DMS
Control					20Hz
128.845	90.2829	132.432	74.7931	143.3	164.122	52.7529	78.9914	128.584	171.101
39.4183	112.768	37.4049	92.389	86.5708	306.576	138.273	161.945	147.054	169.089
131.737	96.9488	130.163	132.818	70.1289	68.1375	114.623	65.8139	133.042	263.212
137.795	73.8174	59.6551	74.8094	82.7305	30.6501	186.79	155.098	122.218	144.637
30.9957	116.509	102.342	127.282	96.381
131.209	109.674	138.003	97.9084	120.888
46.3639	76.5415	98.9646	122.381	48.6661
93.3774	109.881	97.3263	86.3555	77.8484
160.259	113.577	103.709	91.2634	173.486
152.741	42.5183	93.9232	95.3004	111.186
83.1587	99.5468	96.8192	70.8108	90.4502
64.1004	157.935	109.258	133.889	98.3637

## Sheet: A2A-Cre DMS
Control					20Hz
155.485	104.336	158.517	211.747	116.553	36.7055	61.2735	53.3705	80.4342	74.7186
66.5977	39.8055	90.5047	67.5683	134.315	92.3246	72.5588	40.7182	32.9216	94.8758
77.9175	155.859	50.978	20.6848	49.1317	121.632	87.1582	59.8673	30.9123	68.4064
77.6677	32.5275	71.2275	105.224	127.027	96.0752	112.601	41.0698	85.5891	80.457
83.2797	79.353	123.242	86.5122	70.8779
139.053	188.12	105.531	108.264	102.096
87.455	30.7044	104.972	139.743	112.978
109.178	68.2888	91.8588	104.213	105.826
103.367	201.007	103.17	56.0447	81.1955
75.4991	68.7643	95.7861	151.699	112.567
102.596	127.858	106.149	34.1287	121.098
121.905	103.378	98.0645	114.172	66.3345

## Sheet: D1-Cre DLS
Control					20Hz
94.2223	73.7472	89.7374	94.4214	89.6113	149.772	110.057	171.648	95.7027	110.141
106.43	90.5573	166.354	94.0531	92.3789	161.728	127.081	167.432	268.756	211.582
99.348	135.696	43.9087	111.525	118.01	104.82	60.4421	277.911	297.46	278.058
43.3855	86.9201	165.958	142.276	171.909	136.526	90.0117	139.497	209.706	138.031
69.3908	107.805	96.4846	119.79	97.9197
187.224	105.275	37.5578	37.9337	30.1715
106.891	68.5712	127.14	63.4383	58.9632
124.869	92.4621	66.3494	59.2454	54.4412
68.2394	138.967	106.511	177.316	186.596
85.54	67.9166	47.0828	93.3666	91.7828
74.3846	136.043	137.041	134.583	130.969
140.075	96.0399	115.876	72.0504	77.2483

## Sheet: A2A-Cre DLS
Control					20Hz
81.2029	92.8352	47.5851	112.704	143.097	73.4584	34.5275	32.3222	110.97	25.6394
142.661	149.017	66.066	97.9749	73.9388	33.2794	103.869	41.0953	183.117	49.3014
76.1357	58.1476	186.349	89.3207	82.964	94.3849	179.506	64.7436	213.285	37.5554
163.595	32.434	67.5649	94.2612	75.7524	99.1502	45.3173	52.2984	244.757	67.6988
94.3767	48.5678	79.3165	109.994	136.341
42.0283	218.998	153.119	95.7445	87.9069
29.7269	161.775	91.8174	111.754	108.374
101.844	53.8007	77.2756	109.5	100.373
168.429	84.4247	130.907	78.7461	91.2527
107.599	156.177	101.203	121.463	169.249
71.4727	54.803	109.181	98.8969	70.3707
120.928	89.02	89.6168	79.64	60.3806
