# Supplementary material for: Asymmetric cortical projections to striatal direct and indirect pathways distinctly control actions
Source: eLife. 2025 Oct 21;12:RP92992. doi: 10.7554/eLife.92992 (PMC12539805; doi:10.7554/eLife.92992)
Supplement: Figure 3—source data 2. [file elife-92992-fig3-data2.xlsx]

## Sheet: D1-Cre 20Hz stim
Control										20Hz
56.8217	87.3921	74.9282	85.7543	74.1543	102.552	224.676	33.4573	13.4949		136.663	182.31	130.265	95.9829	75.3138	96.1328	138.7	79.3226	159.11
73.4757	100.219	28.1898	107.974	38.4531	103.614	61.1439	97.6077	41.5693		144.899	101.16	1089.39	111.585	87.9314	141.853	123.551	124.914	394.836
169.702	112.388	196.882	106.271	187.393	93.8336	14.1802	168.935	244.936		148.263	88.1017	108.786	139.88	83.8015	70.2655	119.98	63.6658	227.587
80.1891	88.4699	50.86	100.028	80.4206	74.2419	107.391	59.6726	85.9306				126.37	108.826	85.9831	98.1577	146.334	111.968	61.3409
75.2732	104.205	65.3887	90.521	124.531	121.74	89.9388	114.69	116.549
144.538	107.325	183.751	109.451	95.0485	104.018	102.67	125.638	97.5204
73.1714	108.784	68.0676	100.916	107.566	124.2	105.93	98.1145	85.9476
144.154	112.337	110.103	118.497	132.826	94.7931	127.406	108.459	19.0474
82.6744	78.8782	121.829	80.5867	59.6087	81.0075	66.6649	93.4268	195.005
		94.4181	114.497	107.092	93.2498	107.316	95.5542	155.285
		85.2957	132.456	82.8227	102.86	87.0693	104.615	87.4477
		120.286	53.0474	110.085	103.891	105.615	99.8304	57.2668

## Sheet: A2A-Cre 20Hz stim
Control										20Hz
51.803	61.855	121.409	70.6263	138.747	55.859	112.267	123.107	125.604	97.3185	83.9308	206.883	90.6331	10.7149	233.248	112.68	73.1359	85.3317	84.6844	65.3867
75.6833	135.959	96.1168	114.619	86.0208	74.455	106.205	71.2685	94.9403	108.415	78.1238	91.5931	116.801	139.814	100.197	138.096	106.725	176.655	79.2252	109.811
172.514	102.186	82.4744	114.754	75.2324	169.686	81.5285	105.624	79.4556	94.2663	180.302	102.907	119.328	57.9509	70.2846	68.2721	103.504	60.9018	139.744	109.001
65.6983	126.206	97.411	95.3191	130.643	75.373	103.128	122.912	132.165	117.189	97.4835	86.6587			96.044	99.9851	90.8388	90.7707	112.904	145.651
48.7607	74.0039	87.3134	86.4365	76.3365	111.555	106.037	71.6609	116.389	83.8881
185.541	99.7906	115.276	118.244	93.0209	113.072	90.8345	105.427	51.4464	98.9228
80.5184	121.071	79.8222	112.906	91.2831	101.636	99.6047	110.783	111.378	115.57
163.305	91.3834	105.681	94.8649	92.7289	89.484	102.163	105.271	102.15	67.1502
56.1763	87.5456	114.497	92.2285	115.988	108.88	98.2321	83.9458	86.4723	117.279
87.2097	115.188			96.0147	117.748	105.294	103.77	98.2281	199.847
126.265	109.071			101.902	88.8569	82.3517	74.3976	105.885	76.246
86.5255	75.7404			102.083	93.3952	112.354	121.832	95.887	23.9065
