# Supplementary material for: Asymmetric cortical projections to striatal direct and indirect pathways distinctly control actions
Source: eLife. 2025 Oct 21;12:RP92992. doi: 10.7554/eLife.92992 (PMC12539805; doi:10.7554/eLife.92992)
Supplement: Figure 3—source data 3. [file elife-92992-fig3-data3.xlsx]

## Sheet: D1-Cre 20Hz stim
Control								20Hz
63.127	117.069	79.0538	39.223	118.136	137.916	166.95		140.944	131.15	119.25	271.141	173.517	194.902	135.184
106.569	85.338	113.081	124.374	97.3691	106.676	116.769		139.657	59.9951	120.384	96.5021	111.488	242.276	89.1173
130.304	97.5932	107.865	136.403	84.4953	55.4073	16.2809		41.2379	128.771	67.1056	122.941	131.525	101.338	90.4471
79.7947	75.5569	84.0418	121.621	153.327	57.0322	134.362				68.5502	72.4122	242.562	99.081	150.336
120.251	114.073	102.948	90.7898	53.4218	176.553	91.8441
99.9544	110.37	113.01	87.5894	93.2512	66.4148	73.794
95.5925	94.5489	100.984	69.1403	114.915	90.6618	101.035
104.766	73.7049	89.1277	105.736	53.8158	113.538	91.8737
99.6419	131.746	109.889	125.124	131.269	95.8005	107.091
		98.7249	138.751	102.934	80.3957	54.8457
		111.073	115.183	57.0009	128.366	131.625
		90.2017	46.0652	140.065	91.2385	113.53

## Sheet: A2A-Cre 20Hz stim
Control								20Hz
118.557	122.457	117.626	80.5143	98.0864	144.206	24.1117	99.0858	69.2425	100.811	80.0631	392.159	138.028	69.3457	117.597	83.2842
86.0095	37.9163	81.9536	82.1372	66.2904	81.6857	33.3511	104.399	7.56492	87.0244	110.125	89.9436	243.351	97.2139	58.1001	123.875
95.4331	139.627	100.42	137.348	135.623	74.1086	242.537	96.5152	66.3636	95.1799	111.626	77.3976	72.8911	122.486	133.937	91.6159
56.053	124.555	108.727	79.6147	50.4098	109.701	162.512	118.255	86.2779	99.1598			111.65	136.108	25.0476	88.887
151.936	138.478	81.9622	98.951	108.549	89.8937	88.2155	109.957
92.0107	36.967	109.311	121.434	141.041	100.405	49.2722	71.7876
82.8467	117.319	115.765	77.7385	78.6554	73.3166	96.1693	146.368
94.9416	88.0441	61.5769	97.0368	81.0088	89.4987	95.333	58.9096
122.212	94.637	122.658	125.225	140.336	137.185	108.498	94.7221
61.1924	95.8149			104.008	64.6739	106.576	105.145
122.418	100.451			112.873	57.3535	144.743	97.9568
116.39	103.734			83.1186	177.973	48.6805	96.8983
