# Supplementary material for: Asymmetric cortical projections to striatal direct and indirect pathways distinctly control actions
Source: eLife. 2025 Oct 21;12:RP92992. doi: 10.7554/eLife.92992 (PMC12539805; doi:10.7554/eLife.92992)
Supplement: Figure 3—source data 4. [file elife-92992-fig3-data4.xlsx]

## Sheet: DMS
Day	A2aCRE DMS LeverPress						D1CRE DMS LeverPress
1	1	2	4	2	4		3	7	1	15	17	10
2	2	1	0	0	0		2	0	0	22	9	3
3	2	0	0	0	1		0	1	1	88	3	4
4	3	1	0	0	0		1	0	3	60	3	7
5	2	0	2	0	1		1	1	0	49	7	25
6	1	1	1	0	0		3	0	1	59	14	16
7	0	0	0	2	0		0	3	3	84	9	5

## Sheet: DLS
Day	A2aCRE DLS LeverPress						D1CRE DLS LeverPress
1	0	2	1	15	0		8	3	10	6	1	127
2	0	0	0	5	3		0	3	15	7	0	296
3	1	3	2	3	1		0	0	30	2	1	469
4	0	0	1	2	1		1	0	100	1	0	370
5	0	1	2	0	0		0	0	326	7	1	866
6	1	0	3	3	0		2	1	275	10	0	704
7	1	0	0	4	0		0	1	466	6	5	573
