# Supplementary material for: Asymmetric cortical projections to striatal direct and indirect pathways distinctly control actions
Source: eLife. 2025 Oct 21;12:RP92992. doi: 10.7554/eLife.92992 (PMC12539805; doi:10.7554/eLife.92992)
Supplement: Figure 3—source data 5. [file elife-92992-fig3-data5.xlsx]

## Sheet: MCC
Day	A2aCRE MCC LeverPress					D1CRE MCC LeverPress
1	9	6	2	15	2	0	4	24	2	2
2	1	3	2	4	2	2	1	29	3	19
3	8	6	5	6	2	5	3	27	2	49
4	1	5	4	6	9	2	0	16	4	54
5	6	0	22	2	6	3	1	12	3	75
6	9	1	25	3	20	3	2	24	7	84
7	7	0	19	4	11	3	2	21	1	79

## Sheet: M1
Day	A2aCRE M1 LeverPress					D1CRE M1 LeverPress
1	4	1	1	0	9	23	7	10	5	4
2	3	3	3	4	10	33	2	19	20	3
3	2	2	7	28	5	6	4	30	19	1
4	3	0	1	26	21	48	3	19	34	4
5	2	2	4	42	2	6	20	34	35	4
6	5	4	3	33	28	15	27	10	40	3
7	2	2	10	38	12	40	22	6	33	8
