# Supplementary material for: Asymmetric cortical projections to striatal direct and indirect pathways distinctly control actions
Source: eLife. 2025 Oct 21;12:RP92992. doi: 10.7554/eLife.92992 (PMC12539805; doi:10.7554/eLife.92992)
Supplement: Figure 4—source data 1. [file elife-92992-fig4-data1.xlsx]

## Sheet: MCC sequence opto change
D1	A2a
0.412043	-2.76863
2.84491	20.0065
84.3128	-47.0452
22.4036	-4.04477
-4.78895	26.5251
-41.6546	-55.7161
292.156	-32.6516
-19.9026	31.3945
-5.72692	-23.5596
169.457	-23.0913
109.594	7.76672
68.4665	13.646
110.901	12.5644
12.4061	-9.00271
34.9153
185.955

## Sheet: M1 sequence opto change
D1	A2a
-1.02929	-24.7917
187.076	283.019
19.6823	-70.3068
6.50407	62.8637
22.433	29.4221
17.6644	4.43271
-0.78657	34.5462
151.043	36.8095
256.245	19.493
32.8938	80.3009
110.203	27.8111
62.0573	2.35013
-8.8433	-36.3569
	28.214
	143.745
